# Supplementary material
Source: ML conference proceedings conference paper supplement (https://proceedings.neurips.cc/paper_files/paper/2015/hash/3e7e0224018ab3cf51abb96464d518cd-Abstract.html)
Supplement: Supplementary file [file 3e7e0224018ab3cf51abb96464d518cd-Supplemental.zip]

# Supplementary material for “No-Regret Learning in Bayesian Games”

## A Proof of Theorem 11

For readability we repeat the definitions of Lemma 10 and Theorem 11 from the main text.

**Lemma 10** *Let  $D \in \Delta(\Sigma \times \mathcal{V})$  be a joint distribution of (strategy, valuation) profile pairs. Consider a sequence of play of the random matching game, where each player uses a vanishing regret algorithm and let  $D^T$  be the empirical distribution of strategy, valuation profile pairs up till time step  $T$ . Suppose that there exists a subsequence of  $\{D^T\}_T$  that converges in distribution to  $D$ . Then, almost surely,  $D$  is a product distribution, i.e.  $D = D_s \times D_v$ , with  $D_s \in \Delta(\Sigma)$  and  $D_v \in \Delta(\mathcal{V})$  such that  $D_v = \mathcal{F}$  and  $D_s \in \text{BAYES-CCE}$  of the static incomplete information game with distributional beliefs  $\mathcal{F}$ .*

**Theorem 11** *The price of anarchy for Bayesian no-regret dynamics is upper bounded by the price of anarchy of Bayesian coarse correlated equilibria.*

*Proof.* Let  $D \in \Delta(\Sigma \times \mathcal{V})$  be a joint distribution, such that there is a subsequence of  $\{D^T\}_T$ , converging in distribution to  $D$ . Then by Lemma 10, almost surely,  $D$  is a product distribution, i.e.  $D \in \Delta(\Sigma) \times \Delta(\mathcal{V})$  and that the marginal on  $\mathcal{V}$  is equal to  $\mathcal{F}$  and the marginal on  $\Sigma$  is a BAYES-CCE of the static incomplete information game with distributional beliefs  $\mathcal{F}$ .

Therefore, if  $\rho$  is the BAYES-CCE – POA of the mechanism, and if  $(\mathbf{s}, \mathbf{v})$  is a random sample from  $D$ , then almost surely:

$$\mathbb{E}_{\mathbf{s}, \mathbf{v}} [SW(\mathbf{s}(\mathbf{v}); \mathbf{v})] \geq \frac{1}{\rho} \mathbb{E}_{\mathbf{v}} [\text{OPT}(\mathbf{v})] \quad (13)$$

Thus the limit average social welfare of any convergent subsequence will be at least  $\frac{1}{\rho} \mathbb{E}_{\mathbf{v}} [\text{OPT}(\mathbf{v})]$ , which then implies that almost surely:

$$\liminf_{T \rightarrow \infty} \frac{1}{T} \sum_{t=1}^T SW(s^t(v^t); v^t) \geq \frac{1}{\rho} \mathbb{E}_{\mathbf{v}} [\text{OPT}(\mathbf{v})] = \frac{1}{\rho} \lim_{T \rightarrow \infty} \frac{1}{T} \sum_{t=1}^T \text{OPT}(v^t)$$

Thus for any non-measure zero event, for any  $\epsilon$ , there exists a  $f(\epsilon)$  such that for any  $T \geq f(\epsilon)$ :

$$\frac{1}{T} \sum_{t=1}^T SW(s^t(v^t); v^t) \geq \frac{1}{\rho} \frac{1}{T} \sum_{t=1}^T \text{OPT}(v^t) - \epsilon$$

With no loss of generality we can assume that  $\mathbb{E}_{\mathbf{v}} [\text{OPT}(\mathbf{v})] > 0$  (o.w. valuations are all zero and theorem holds trivially). Since, the average optimal welfare converges almost surely to  $\mathbb{E}_{\mathbf{v}} [\text{OPT}(\mathbf{v})]$ , we get that for any non-measure zero event, there exists a  $g(\delta)$  such that for  $T \geq g(\delta)$ ,  $\frac{1}{T} \sum_{t=1}^T \text{OPT}(v^t)$  is bounded away from zero. Thereby, we can turn the additive error into a multiplicative one, i.e. for any non-measure zero event and for any  $\epsilon'$  there exists  $w(\epsilon')$  such that for any  $T \geq w(\epsilon')$ :

$$\frac{1}{T} \sum_{t=1}^T SW(s^t(v^t); v^t) \geq \frac{1}{\rho} (1 + \epsilon') \frac{1}{T} \sum_{t=1}^T \text{OPT}(v^t)$$

This implies that almost surely:

$$\limsup_{T \rightarrow \infty} \frac{\frac{1}{T} \sum_{t=1}^T \text{OPT}(v^t)}{\frac{1}{T} \sum_{t=1}^T SW(s^t(v^t); v^t)} \leq \rho = \text{BAYES-CCE-POA}$$

■

## B Proof of Theorem 14

**Theorem 14** Consider the repeated matching game with a  $(\lambda, \mu)$ -smooth mechanism. Suppose that for any  $T \geq T^0$ , each player in each of the  $n$  populations has regret at most  $\frac{\epsilon}{n}$ . Then for every  $\delta$  and  $\rho$ , there exists a  $T^*(\delta, \rho)$ , such that for any  $T \geq \min\{T^0, T^*\}$ , with probability  $1 - \rho$ :

$$\frac{1}{T} \sum_{t=1}^T SW(s^t(v^t); v^t) \geq \frac{\lambda}{\max\{1, \mu\}} \mathbb{E}_{\mathbf{v}} [\text{OPT}(\mathbf{v})] - \delta - \mu \cdot \epsilon \quad (14)$$

Moreover,  $T^*(\delta, \rho) \leq \frac{54 \cdot n^3 \cdot |\Sigma| \cdot |\mathcal{V}|^2 \cdot H^3}{\delta^3} \log\left(\frac{2}{\rho}\right)$ .

*Proof.* Fix a population  $i$  and a Bayesian strategy  $s_i^* \in \Sigma_i$ , as well as a Bayesian strategy profile  $s \in \Sigma$ . For shorter notation we will denote:

$$\pi_i(s_i^*, s, v) = U_i(s_i^*(v_i), s_{-i}(v_{-i}); v_i).$$

For a time step  $T$ , let  $p^T(s) = \frac{|\mathcal{T}_s|}{T}$  be the empirical distribution of a Bayesian strategy  $s$  and with  $p^T(v|s) = \frac{|\mathcal{T}_{s,v}|}{|\mathcal{T}_s|}$  be the empirical distribution of values conditional on a Bayesian strategy  $s$ . The average utility of a population  $i$  up till time step  $T$ , when switching to a fixed Bayesian strategy  $s_i^*$ , can be written as:

$$\frac{1}{T} \sum_{t=1}^T \pi(s_i^*, s^t, v^t) = \sum_{s \in \Sigma} p^T(s) \sum_{v \in \mathcal{V}} p^T(v|s) \cdot \pi_i(s_i^*, s, v) \quad (15)$$

We will show that for any  $s_i^*$ , there exists a  $T^*(\delta, \rho)$  such that for any  $T \geq T^*(\delta, \rho)$ , with probability  $1 - \rho$ :

$$\sum_{s \in \Sigma} p^T(s) \sum_{v \in \mathcal{V}} p^T(v|s) \cdot \pi_i(s_i^*, s, v) \geq \sum_{s \in \Sigma} p^T(s) \mathbb{E}_{\mathbf{v}} [\pi_i(s_i^*, s, \mathbf{v})] - \delta \quad (16)$$

where  $\mathbf{v}$  is a random variable drawn from the distribution of valuation profiles  $\mathcal{F}$ . We will denote with  $p(v)$  the density function implied by distribution  $\mathcal{F}$ .

In what follows we will denote with  $H = \max_{i \in [n], v_i \in \mathcal{V}_i, x_i \in \mathcal{X}_i} v_i(x_i)$  the maximum possible value of any player. Thus observe that the utility of any player is upper bounded by  $H$  and that the revenue collected by any player at equilibrium is upper bounded by  $H$ .

For a time period  $T$ , let  $G = \{s \in \Sigma : p^T(s) \geq \zeta\}$ . Then observe that:

$$\begin{aligned} \sum_{s \in \Sigma} p^T(s) \sum_{v \in \mathcal{V}} (p^T(v|s) - p(v)) \cdot \pi_i(s_i^*, s, v) &\geq \\ \sum_{s \in G} p^T(s) \sum_{v \in \mathcal{V}} (p^T(v|s) - p(v)) \cdot \pi_i(s_i^*, s, v) &- \zeta \cdot |\Sigma| \cdot H \end{aligned}$$

Observe that for any  $s \in G$ ,  $|\mathcal{T}_s| \geq \zeta \cdot T$ . Thus  $p^T(v|s)$  is the empirical mean of at least  $\zeta \cdot T$  independent random samples of a Bernoulli trial with success probability  $p(v)$ . Hence, by Hoeffding bounds, we have that  $|p^T(v|s) - p(v)| \leq t$  with probability at least  $1 - 2 \exp(-2 \cdot \zeta \cdot T \cdot t^2)$ . Thus with that much probability we get:

$$\sum_{s \in \Sigma} p^T(s) \sum_{v \in \mathcal{V}} (p^T(v|s) - p(v)) \cdot \pi_i(s_i^*, s, v) \geq -t \cdot |\mathcal{V}| \cdot H - \zeta \cdot |\Sigma| \cdot H$$

By setting  $t = \frac{\delta}{2 \cdot |\mathcal{V}| \cdot H}$ ,  $\zeta = \frac{\delta}{2 \cdot |\Sigma| \cdot H}$  and  $T^*(\delta, \rho) = \frac{16 \cdot |\Sigma| \cdot |\mathcal{V}|^2 \cdot H^3}{\delta^3} \log\left(\frac{2}{\rho}\right)$ , we get the claimed property in Equation (16).

Now suppose that after time step  $T^0$  each player in a population has regret  $\epsilon/n$ . Thus the average utility of the population is at least the utility from switching to any fixed Bayesian strategy  $s_i^*$ , minus an error term of  $\epsilon/n$ :

$$\sum_{s \in \Sigma} p^T(s) \sum_{v \in \mathcal{V}} p^T(v|s) \pi_i(s_i, s, v) \geq \sum_{s \in \Sigma} p^T(s) \sum_{v \in \mathcal{V}} p^T(v|s) \pi_i(s_i^*, s, v) - \frac{\epsilon}{n} \quad (17)$$

From the previous analysis, for any  $T \geq \min\{T^0, T^*(\frac{2\delta}{3 \cdot n}, \rho)\}$ , we get that with probability  $1 - \rho$ :

$$\sum_{s \in \Sigma} p^T(s) \sum_{v \in \mathcal{V}} p^T(v|s) \pi_i(s_i, s, v) \geq \sum_{s \in \Sigma} p^T(s) \mathbb{E}_{\mathbf{v}} [\pi_i(s_i^*, s, \mathbf{v})] - \frac{2\delta}{3n} - \frac{\epsilon}{n} \quad (18)$$

Summing over all populations and using the Bayesian smoothness property of the mechanism from Theorem 12, we have that with probability  $1 - \rho$ :

$$\begin{aligned} \sum_{s \in \Sigma} p^T(s) \sum_{v \in \mathcal{V}} p^T(v|s) \sum_i \pi_i(s_i, s, v) &\geq \sum_{s \in \Sigma} p^T(s) (\lambda \mathbb{E}_{\mathbf{v}} [\text{OPT}(\mathbf{v})] - \mu R^{\text{AG}}(s)) - \frac{2\delta}{3} - \epsilon \\ &\geq \lambda \mathbb{E}_{\mathbf{v}} [\text{OPT}(\mathbf{v})] - \mu \sum_{s \in \Sigma} p^T(s) R^{\text{AG}}(s) - \frac{2\delta}{3} - \epsilon \end{aligned}$$

To conclude the theorem we observe that since for any  $s \in \Sigma$ ,  $|p^T(v|s) - p(v)| \leq \frac{\delta}{3 \cdot n \cdot |\mathcal{V}| \cdot H}$ , we get that:

$$R^{\text{AG}}(s) = \sum_{v \in \mathcal{V}} p(v) R(s(v)) \leq \sum_{v \in \mathcal{V}} p^T(v|s) R(s(v)) + \frac{\delta}{3} \quad (19)$$

Since, the revenue collected by a player at any action in the support of an equilibrium is at most  $H$ . By the latter we can combine the revenue on the right hand side with the utility on the left hand side. We can also bound the remaining  $(\mu - 1)$  of the revenue, by  $(\mu - 1)$  of the average welfare minus  $\epsilon$ , since each player in each population can always drop out of the auction and therefore his average utility at an  $\frac{\epsilon}{n}$ -regret sequence must be at least  $-\frac{\epsilon}{n}$ .

Hence, we get that:

$$\sum_{s \in \Sigma} p^T(s) \sum_{v \in \mathcal{V}} p^T(v|s) SW(s(v); v) \geq \frac{\lambda}{\max\{1, \mu\}} \mathbb{E}_{\mathbf{v}} [\text{OPT}(\mathbf{v})] - \delta - \mu \cdot \epsilon \quad (20)$$

Thus choosing  $T^*(\rho, \frac{2\delta}{3 \cdot n}) = \frac{54 \cdot n^3 \cdot |\Sigma| \cdot |\mathcal{V}|^2 \cdot H^3}{\delta^3} \log\left(\frac{2}{\rho}\right)$ , we get the conditions of the theorem.  $\blacksquare$
